# Supplementary material
Source: ML conference proceedings conference paper supplement (https://openaccess.thecvf.com/content/CVPR2022/html/Gao_AdaMixer_A_Fast-Converging_CVPR_2022_paper.html)
Supplement: Supplementary file 1 [file Gao_AdaMixer_A_Fast-Converging_CVPR_2022_supplemental.zip]

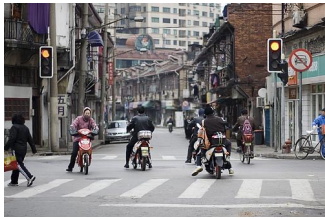

input image

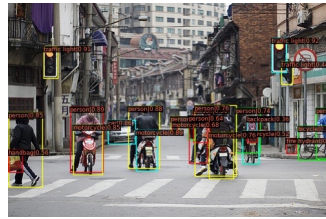

detection results

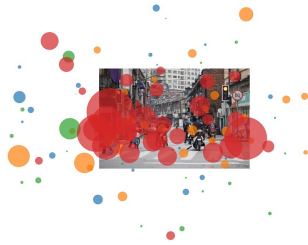

stage 1:  
sampling points for person #1

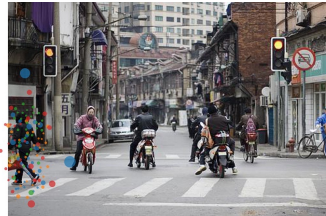

stage 2:  
sampling points for person #1

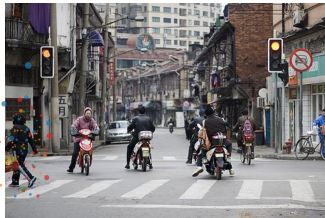

stage 3:  
sampling points for person #1

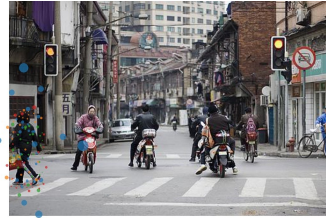

stage 4:  
sampling points for person #1

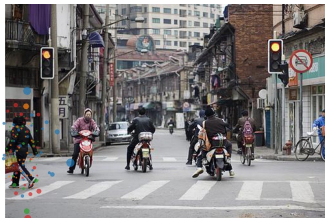

stage 5:  
sampling points for person #1

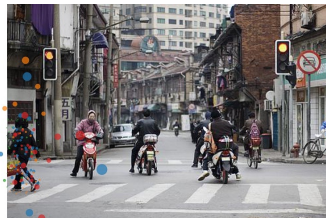

stage 6:  
sampling points for person #1



input image

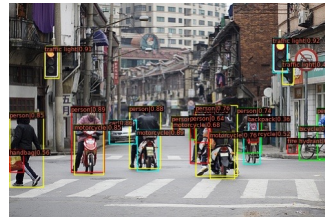

detection results

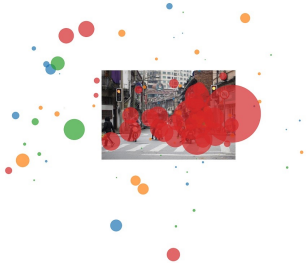

stage 1:  
sampling points for person #1

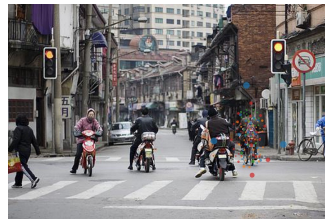

stage 2:  
sampling points for person #1

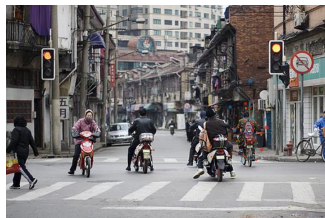

stage 3:  
sampling points for person #1

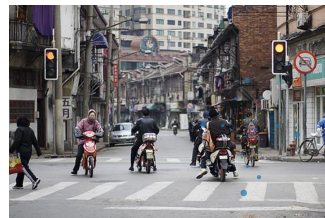

stage 4:  
sampling points for person #1

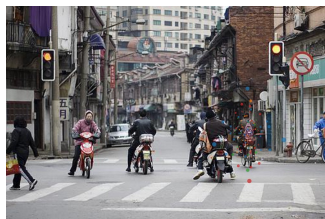

stage 5:  
sampling points for person #1

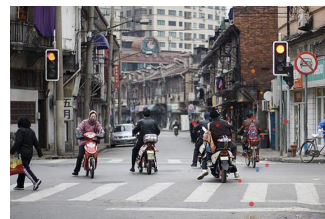

stage 6:  
sampling points for person #1
