# Supplementary material
Source: ML conference proceedings conference paper supplement (https://openaccess.thecvf.com/content/CVPR2022/html/Gao_AdaMixer_A_Fast-Converging_CVPR_2022_paper.html)
Supplement: Supplementary file 3 [file Gao_AdaMixer_A_Fast-Converging_CVPR_2022_supplemental.zip]

Archive with 108 entries (97 files):
- 08865-supp/
- 08865-supp/visualizations/
- __MACOSX/08865-supp/._visualizations
- 08865-supp/08865-supp.pdf
- 08865-supp/visualizations/.DS_Store
- __MACOSX/08865-supp/visualizations/._.DS_Store
- 08865-supp/visualizations/000000226417/
- __MACOSX/08865-supp/visualizations/._000000226417
- 08865-supp/visualizations/000000577959/
- __MACOSX/08865-supp/visualizations/._000000577959
- 08865-supp/visualizations/readme.md
- __MACOSX/08865-supp/visualizations/._readme.md
- 08865-supp/visualizations/000000569273/
- __MACOSX/08865-supp/visualizations/._000000569273
- 08865-supp/visualizations/000000449406/
- __MACOSX/08865-supp/visualizations/._000000449406
- 08865-supp/visualizations/000000226417/input.jpeg
- __MACOSX/08865-supp/visualizations/000000226417/._input.jpeg
- 08865-supp/visualizations/000000226417/bike_0/
- __MACOSX/08865-supp/visualizations/000000226417/._bike_0
- 08865-supp/visualizations/000000226417/.DS_Store
- __MACOSX/08865-supp/visualizations/000000226417/._.DS_Store
- 08865-supp/visualizations/000000226417/person_1/
- __MACOSX/08865-supp/visualizations/000000226417/._person_1
- 08865-supp/visualizations/000000226417/person_0/
- __MACOSX/08865-supp/visualizations/000000226417/._person_0
- 08865-supp/visualizations/000000226417/detection result.jpg
- __MACOSX/08865-supp/visualizations/000000226417/._detection result.jpg
- 08865-supp/visualizations/000000577959/input.jpeg
- __MACOSX/08865-supp/visualizations/000000577959/._input.jpeg
- 08865-supp/visualizations/000000577959/.DS_Store
- __MACOSX/08865-supp/visualizations/000000577959/._.DS_Store
- 08865-supp/visualizations/000000577959/person/
- __MACOSX/08865-supp/visualizations/000000577959/._person
- 08865-supp/visualizations/000000577959/detection result.jpg
- __MACOSX/08865-supp/visualizations/000000577959/._detection result.jpg
- 08865-supp/visualizations/000000577959/kite/
- __MACOSX/08865-supp/visualizations/000000577959/._kite
- 08865-supp/visualizations/000000569273/input.jpeg
- __MACOSX/08865-supp/visualizations/000000569273/._input.jpeg
- 08865-supp/visualizations/000000569273/detection results.jpg
- __MACOSX/08865-supp/visualizations/000000569273/._detection results.jpg
- 08865-supp/visualizations/000000449406/input.jpeg
- __MACOSX/08865-supp/visualizations/000000449406/._input.jpeg
- 08865-supp/visualizations/000000449406/detection result.jpg
- __MACOSX/08865-supp/visualizations/000000449406/._detection result.jpg
- 08865-supp/visualizations/000000226417/bike_0/sampling-points_image-000000226417_stage-0.jpg
- __MACOSX/08865-supp/visualizations/000000226417/bike_0/._sampling-points_image-000000226417_stage-0.jpg
- 08865-supp/visualizations/000000226417/bike_0/sampling-points_image-000000226417_stage-1.jpg
- __MACOSX/08865-supp/visualizations/000000226417/bike_0/._sampling-points_image-000000226417_stage-1.jpg
- 08865-supp/visualizations/000000226417/bike_0/sampling-points_image-000000226417_stage-3.jpg
- __MACOSX/08865-supp/visualizations/000000226417/bike_0/._sampling-points_image-000000226417_stage-3.jpg
- 08865-supp/visualizations/000000226417/bike_0/sampling-points_image-000000226417_stage-2.jpg
- __MACOSX/08865-supp/visualizations/000000226417/bike_0/._sampling-points_image-000000226417_stage-2.jpg
- 08865-supp/visualizations/000000226417/bike_0/sampling-points_image-000000226417_stage-5.jpg
- __MACOSX/08865-supp/visualizations/000000226417/bike_0/._sampling-points_image-000000226417_stage-5.jpg
- 08865-supp/visualizations/000000226417/bike_0/sampling-points_image-000000226417_stage-4.jpg
- __MACOSX/08865-supp/visualizations/000000226417/bike_0/._sampling-points_image-000000226417_stage-4.jpg
- 08865-supp/visualizations/000000226417/person_1/supp_vis.pdf
- __MACOSX/08865-supp/visualizations/000000226417/person_1/._supp_vis.pdf
- 08865-supp/visualizations/000000226417/person_1/sampling-points_image-000000226417_stage-0.jpg
- __MACOSX/08865-supp/visualizations/000000226417/person_1/._sampling-points_image-000000226417_stage-0.jpg
- 08865-supp/visualizations/000000226417/person_1/sampling-points_image-000000226417_stage-1.jpg
- __MACOSX/08865-supp/visualizations/000000226417/person_1/._sampling-points_image-000000226417_stage-1.jpg
- 08865-supp/visualizations/000000226417/person_1/sampling-points_image-000000226417_stage-3.jpg
- __MACOSX/08865-supp/visualizations/000000226417/person_1/._sampling-points_image-000000226417_stage-3.jpg
- 08865-supp/visualizations/000000226417/person_1/sampling-points_image-000000226417_stage-2.jpg
- __MACOSX/08865-supp/visualizations/000000226417/person_1/._sampling-points_image-000000226417_stage-2.jpg
- 08865-supp/visualizations/000000226417/person_1/sampling-points_image-000000226417_stage-5.jpg
- __MACOSX/08865-supp/visualizations/000000226417/person_1/._sampling-points_image-000000226417_stage-5.jpg
- 08865-supp/visualizations/000000226417/person_1/sampling-points_image-000000226417_stage-4.jpg
- __MACOSX/08865-supp/visualizations/000000226417/person_1/._sampling-points_image-000000226417_stage-4.jpg
- 08865-supp/visualizations/000000226417/person_0/sampling-points_image-000000226417_stage-0.jpg
- __MACOSX/08865-supp/visualizations/000000226417/person_0/._sampling-points_image-000000226417_stage-0.jpg
- 08865-supp/visualizations/000000226417/person_0/sampling-points_image-000000226417_stage-1.jpg
- __MACOSX/08865-supp/visualizations/000000226417/person_0/._sampling-points_image-000000226417_stage-1.jpg
- 08865-supp/visualizations/000000226417/person_0/sampling-points_image-000000226417_stage-3.jpg
- __MACOSX/08865-supp/visualizations/000000226417/person_0/._sampling-points_image-000000226417_stage-3.jpg
- 08865-supp/visualizations/000000226417/person_0/sampling-points_image-000000226417_stage-2.jpg
- __MACOSX/08865-supp/visualizations/000000226417/person_0/._sampling-points_image-000000226417_stage-2.jpg
- 08865-supp/visualizations/000000226417/person_0/sampling-points_image-000000226417_stage-5.jpg
- __MACOSX/08865-supp/visualizations/000000226417/person_0/._sampling-points_image-000000226417_stage-5.jpg
- 08865-supp/visualizations/000000226417/person_0/sampling-points_image-000000226417_stage-4.jpg
- __MACOSX/08865-supp/visualizations/000000226417/person_0/._sampling-points_image-000000226417_stage-4.jpg
- 08865-supp/visualizations/000000577959/person/sampling-points_image-000000577959_stage-1.jpg
- __MACOSX/08865-supp/visualizations/000000577959/person/._sampling-points_image-000000577959_stage-1.jpg
- 08865-supp/visualizations/000000577959/person/sampling-points_image-000000577959_stage-0.jpg
- __MACOSX/08865-supp/visualizations/000000577959/person/._sampling-points_image-000000577959_stage-0.jpg
- 08865-supp/visualizations/000000577959/person/sampling-points_image-000000577959_stage-2.jpg
- __MACOSX/08865-supp/visualizations/000000577959/person/._sampling-points_image-000000577959_stage-2.jpg
- 08865-supp/visualizations/000000577959/person/sampling-points_image-000000577959_stage-3.jpg
- __MACOSX/08865-supp/visualizations/000000577959/person/._sampling-points_image-000000577959_stage-3.jpg
- 08865-supp/visualizations/000000577959/person/sampling-points_image-000000577959_stage-4.jpg
- __MACOSX/08865-supp/visualizations/000000577959/person/._sampling-points_image-000000577959_stage-4.jpg
- 08865-supp/visualizations/000000577959/person/sampling-points_image-000000577959_stage-5.jpg
- __MACOSX/08865-supp/visualizations/000000577959/person/._sampling-points_image-000000577959_stage-5.jpg
- 08865-supp/visualizations/000000577959/kite/sampling-points_image-000000577959_stage-1.jpg
- __MACOSX/08865-supp/visualizations/000000577959/kite/._sampling-points_image-000000577959_stage-1.jpg
- 08865-supp/visualizations/000000577959/kite/sampling-points_image-000000577959_stage-0.jpg
- __MACOSX/08865-supp/visualizations/000000577959/kite/._sampling-points_image-000000577959_stage-0.jpg
- 08865-supp/visualizations/000000577959/kite/sampling-points_image-000000577959_stage-2.jpg
- __MACOSX/08865-supp/visualizations/000000577959/kite/._sampling-points_image-000000577959_stage-2.jpg
- 08865-supp/visualizations/000000577959/kite/sampling-points_image-000000577959_stage-3.jpg
- __MACOSX/08865-supp/visualizations/000000577959/kite/._sampling-points_image-000000577959_stage-3.jpg
- 08865-supp/visualizations/000000577959/kite/sampling-points_image-000000577959_stage-4.jpg
- __MACOSX/08865-supp/visualizations/000000577959/kite/._sampling-points_image-000000577959_stage-4.jpg
- 08865-supp/visualizations/000000577959/kite/sampling-points_image-000000577959_stage-5.jpg
- __MACOSX/08865-supp/visualizations/000000577959/kite/._sampling-points_image-000000577959_stage-5.jpg
