# Supplementary material
Source: ML conference proceedings conference paper supplement (https://openaccess.thecvf.com/content/CVPR2022/html/Gao_AdaMixer_A_Fast-Converging_CVPR_2022_paper.html)
Supplement: Supplementary file 3 [file Gao_AdaMixer_A_Fast-Converging_CVPR_2022_supplemental.zip › 08865-supp/visualizations/readme.md]

# AdaMixer Visualizations
This folder contains visualizations on images `coco/val2017/{subfolder_name}.jpg` with AdaMixer w ResNet-50 (47.0 val AP in Table 5).

There is `input.jpeg` and `detection\ result.jpg` in every subfolder showing detection results. The subfolder `000000226417` and `000000577959` also have visualizations for sampling points in different AdaMixer decoder stages to a query.
